# Supplementary material for: A supramolecular Cd(ii)-metallogel: an efficient semiconductive electronic device
Source: Royal Society of Chemistry journal article supplement (doi:10.1039/c8dt03773f), 2018-01-01
Supplement: c8dt03773f1.pdf [file c8dt03773f1.pdf]

## *Electronic Supplementary Information†*

# **A Supramolecular Cd(II)-metallogel: An Efficient Semiconductive Electronic Device†**

Subhendu Dhibar,<sup>a</sup> Arka Dey,<sup>b</sup> Santanu Majumdar,<sup>a</sup> Debasish Ghosh,<sup>a</sup> Amit Mandal,<sup>c</sup> Partha Pratim Ray,<sup>\*,b</sup> Biswajit Dey<sup>\*,a</sup>

<sup>a</sup>Department of Chemistry, Visva-Bharati University, Santiniketan 731235, India

\*E-mail: bdeychem@gmail.com; Tel: +91 9433868381

<sup>b</sup>Department of Physics, Jadavpur University, Jadavpur, Kolkata, 700 032, India

\*E-mail: partha@phys.jdvu.ac.in; Fax: +91 3324138917

<sup>c</sup>Department of Chemistry, Behala college, Parnashree, Kolkata, 700060, India

## FT-IR Spectroscopy of CdA-OX Metallogel

Fourier transform infrared (FTIR) spectra of the CdA-OX metallogel showed different characteristic stretching frequencies at  $\sim 3500$  (broad), 2922, 1425 and  $1050\text{ cm}^{-1}$  and this clearly indicates the predominant supramolecular interactions among the constituents of CdA-OX metallogel.<sup>1,2</sup>

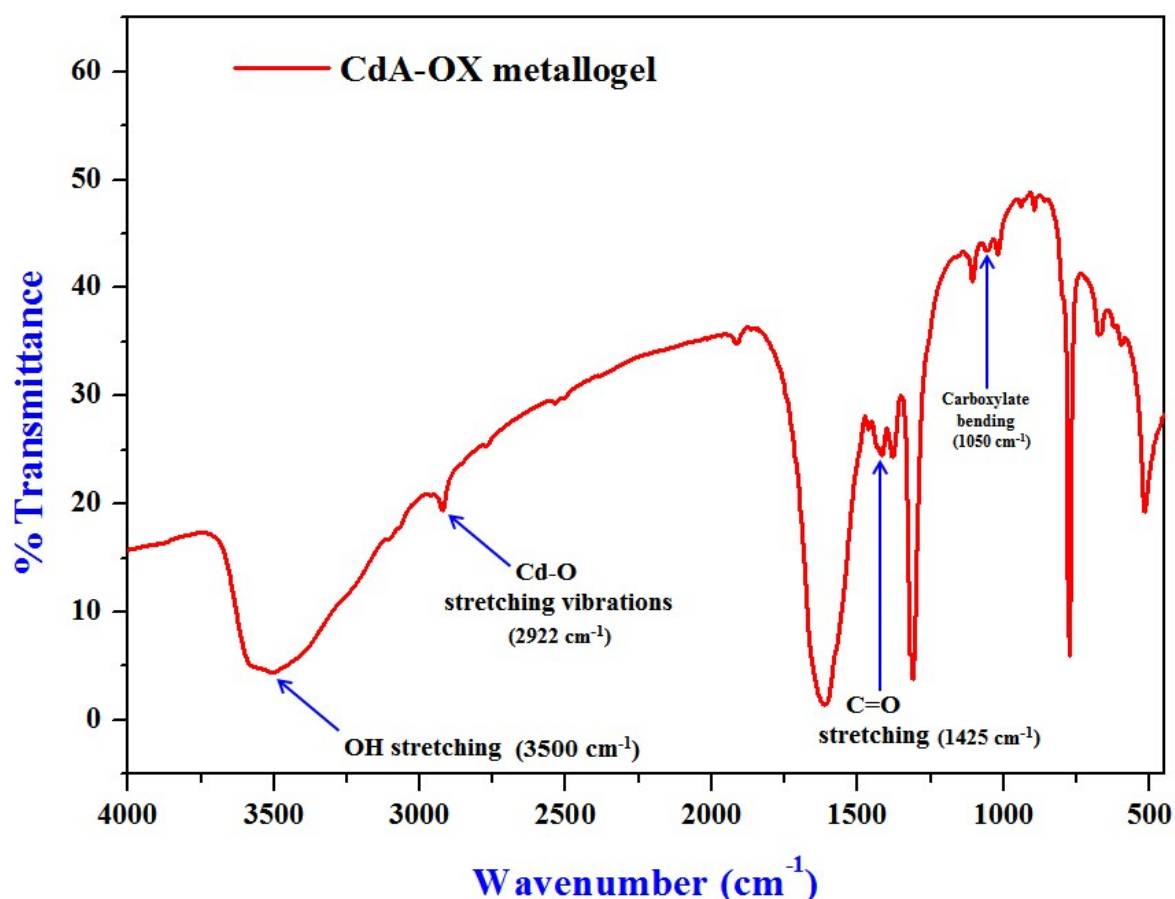

**Fig. S1.** FT-IR Spectra of CdA-OX Metallogel.

## Gelation ability

The gelation process of  $\text{Cd}(\text{OAc})_2 \cdot 2\text{H}_2\text{O}$  and oxalic acid dihydrate was tested in different solvents (other than DMF) where the minimum critical gel concentration of CdA-OX metallogel was maintained by the synthetic method of CdA-OX metallogel in DMF solvent, described in the experimental section (2.3) of the manuscript.<sup>a</sup> The formations of CdA-OX metallogel in different solvents were studied through checking the stability of the gel containing inverted vial against the gravitational force (*Inversion Vial Test*).<sup>1</sup> The experimental results are mentioned in the Table S1. Table S1 clearly shows that the mechanically stable CdA-OX metallogel is exclusively formed in DMF solvent medium (Fig. 1).

**Table S1.** Gelation process of CdA-OX metallogel<sup>a</sup> in various solvents<sup>b</sup>

| Entry | Solvent <sup>b</sup> | Phase <sup>c</sup> | Conc. <sup>d</sup> | Vol. | Gelation Time | Gel-Phase Colour | Picture                                                                               |
|-------|----------------------|--------------------|--------------------|------|---------------|------------------|---------------------------------------------------------------------------------------|
| 1.    | H <sub>2</sub> O     | WG                 | 1200               | 1    | 30s           | White            |    |
| 2.    | MeOH                 | WG                 | 1200               | 1    | >30s          | White            |    |
| 3.    | EtOH                 | WG                 | 1200               | 1    | 1min          | White            |    |
| 4.    | EtOAc                | I                  | 1200               | 1    | -             | -                |    |
| 5.    | DMSO                 | WG                 | 1200               | 1    | 1min          | White            |    |
| 6.    | CH <sub>3</sub> CN   | P                  | 1200               | 1    | -             | -                |    |
| 7.    | DCM                  | P                  | 1200               | 1    | -             | -                |   |
| 8.    | THF                  | P                  | 1200               | 1    | -             | -                |  |
| 9.    | <i>n</i> -Hexane     | I                  | 1200               | 1    | -             | -                |  |
| 10.   | Acetone              | I                  | 1200               | 1    | -             | -                |  |
| 11.   | Toluene              | I                  | 1200               | 1    | -             | -                |  |
| 12.   | CHCl <sub>3</sub>    | I                  | 1200               | 1    | -             | -                |  |
| 13.   | Benzene              | I                  | 1200               | 1    | -             | -                |  |
| 14.   | PET                  | I                  | 1200               | 1    | -             | -                |  |

<sup>a</sup>Gelation tests were performed following the synthetic method discussed in the Experimental Section 2.3.<sup>b</sup>Solvent abbreviations: H<sub>2</sub>O = Water, MeOH = Methanol, EtOH = Ethanol, EtOAc = Ethyl Acetate, DMSO = Dimethyl sulfoxide, CH<sub>3</sub>CN = Acetonitrile, DCM = Dichloromethane, THF = Tetrahydrofuran, CHCl<sub>3</sub> = Chloroform, PET = Petroleum ether.<sup>c</sup>WG = weak gel; I = insoluble; P = precipitate.<sup>d</sup>Minimum Gelation Concentration (MGC) of CdA-OX metallogel (in mg mL<sup>-1</sup>).

Reference:

1. S. Saha, E.-M. Schçn, C. Cativiela, D. D. Díaz and R. Banerjee, *Chem. Eur. J.*, 2013, **19**, 9562-9568
2. M. A. Islam, F. Haque, K. S. Rahman, N. Dhar, M. S. Hossain, Y. Sulaiman and N. Amin, *Optik*, 2015, **126**, 3177-3180.
